# Supplementary material for: Discovery of a non-canonical prototype long-chain monoacylglycerol lipase through a structure-based endogenous reaction intermediate complex
Source: PubMed Central journal article supplement (PMC10682391; doi:10.1038/s41467-023-43354-4), 2023-11-27
Supplement: 41467_2023_43354_MOESM3_ESM.pdf [file 41467_2023_43354_MOESM3_ESM.pdf]

## **Description of Additional Supplementary Files**

**File Name:** Supplementary Data 1

**Description:** A search against the UniProtKB50 protein sequence data base revealed the top scoring 1000 sequence families with a minimal threshold score of 70 and an E value of  $7 \times 10^{-}$  and archaeal phyla, to the extent organisms of origin were unambiguously determined.

**File Name:** Supplementary Data 2

**Description:** Source Data for Supplementary Figure 3.
